# Supplementary material
Source: PubMed Central journal article supplement (PMC3190083)
Supplement: NIHMS317215-supplement-01.pdf [file NIHMS317215-supplement-01.pdf]

| Electronic Appendix 1. Full results for longitudinal negative binomial results from a single multivariate model* predicting Fast Food meals/week, The National Longitudinal Study of Adolescent Health waves II (1996, 12-22 years) and III (2001, 18-28 years) |             |               |               |          |          |
|-----------------------------------------------------------------------------------------------------------------------------------------------------------------------------------------------------------------------------------------------------------------|-------------|---------------|---------------|----------|----------|
| <i>Variable</i>                                                                                                                                                                                                                                                 | <i>Coef</i> | <i>95% CI</i> | <i>95% CI</i> | <i>Z</i> | <i>P</i> |
| Wave 2                                                                                                                                                                                                                                                          | 0.2688      | -0.1219       | 0.6595        | 1.35     | 0.177    |
| Individual-level Baseline Age† < 13 years                                                                                                                                                                                                                       | -0.1794     | -0.2978       | -0.0610       | -2.97    | 0.003    |
| Individual-level Baseline Age 14 years                                                                                                                                                                                                                          | -0.1615     | -0.2670       | -0.0561       | -3.00    | 0.003    |
| Individual-level Baseline Age 15 years                                                                                                                                                                                                                          | -0.0884     | -0.1874       | 0.0106        | -1.75    | 0.080    |
| Individual-level Baseline Age 16 years                                                                                                                                                                                                                          | 0.0733      | -0.0176       | 0.1642        | 1.58     | 0.114    |
| Individual-level Baseline Age 17 years                                                                                                                                                                                                                          | 0.1286      | 0.0400        | 0.2171        | 2.85     | 0.004    |
| Individual-level Baseline Age 18 years                                                                                                                                                                                                                          | 0.1895      | 0.1014        | 0.2776        | 4.22     | 0.0001   |
| Individual-level Baseline Age 19 years                                                                                                                                                                                                                          | 0.1470      | 0.0721        | 0.2218        | 3.85     | 0.0001   |
| Individual-level Baseline Age 20 years                                                                                                                                                                                                                          | 0.1588      | 0.0888        | 0.2287        | 4.45     | 0.0001   |
| Individual-level Baseline Age 21 years                                                                                                                                                                                                                          | 0.1553      | 0.0903        | 0.2203        | 4.68     | 0.0001   |
| Individual-level Baseline Age 22 years                                                                                                                                                                                                                          | 0.0946      | 0.0319        | 0.1573        | 2.96     | 0.003    |
| Individual-level Baseline Age 23 years                                                                                                                                                                                                                          | 0.0669      | 0.0045        | 0.1292        | 2.10     | 0.035    |
| Individual-level Baseline Age 24 years                                                                                                                                                                                                                          | 0.0438      | -0.0197       | 0.1074        | 1.35     | 0.176    |
| Individual-level gender (Female)                                                                                                                                                                                                                                | -0.1085     | -0.4039       | 0.1869        | -0.72    | 0.472    |
| Individual-level race/ethnicity (Black)                                                                                                                                                                                                                         | -0.4774     | -0.9373       | -0.0175       | -2.03    | 0.042    |
| Individual-level race/ethnicity (Asian)                                                                                                                                                                                                                         | -1.7979     | -2.4912       | -1.1046       | -5.08    | 0.0001   |
| Individual-level race/ethnicity (Hispanic)                                                                                                                                                                                                                      | -0.5452     | -1.0616       | -0.0288       | -2.07    | 0.039    |
| Individual-level Household Income                                                                                                                                                                                                                               | 0.0039      | -0.0024       | 0.0103        | 1.21     | 0.225    |

|                                                                        |         |         |         |       |       |
|------------------------------------------------------------------------|---------|---------|---------|-------|-------|
| Individual-level Parent Education (High School)                        | 0.0239  | -0.0080 | 0.0558  | 1.47  | 0.142 |
| Individual-level Parent Education (Some College)                       | 0.0295  | -0.0041 | 0.0630  | 1.72  | 0.085 |
| Individual-level Parent Education (College)                            | 0.0102  | -0.0270 | 0.0475  | 0.54  | 0.591 |
| County-level Price-Soda‡                                               | -0.2113 | -0.3650 | -0.0576 | -2.69 | 0.007 |
| County-level Price-Burger‡                                             | -0.0342 | -0.1777 | 0.1094  | -0.47 | 0.641 |
| County-level Price-Pizza‡                                              | -0.0447 | -0.0790 | -0.0104 | -2.55 | 0.011 |
| County-level Price-Steak‡                                              | 0.0183  | -0.0112 | 0.0478  | 1.21  | 0.225 |
| County-level Price-Milk‡                                               | 0.0110  | -0.1085 | 0.1305  | 0.18  | 0.857 |
| County-level Price-Fried Chicken‡                                      | -0.0203 | -0.1388 | 0.0982  | -0.34 | 0.737 |
| CPI‡                                                                   | 1.1560  | -0.3796 | 2.6916  | 1.48  | 0.140 |
| Individual-level Race/ethnicity (Black)*<br>County-level Price-Soda‡   | -0.2701 | -0.4489 | -0.0913 | -2.96 | 0.003 |
| Individual-level Race/ethnicity (Black)*<br>County-level Price-Burger‡ | 0.0450  | -0.1171 | 0.2071  | 0.54  | 0.586 |
| Individual-level Race/ethnicity (Black)*<br>County-level Price-Pizza‡  | 0.0192  | -0.0162 | 0.0546  | 1.06  | 0.288 |
| Individual-level Race/ethnicity (Black)*<br>County-level Price-Steak‡  | 0.0075  | -0.0241 | 0.0391  | 0.46  | 0.642 |
| Individual-level Race/ethnicity (Black)*<br>County-level Price-Milk‡   | 0.2396  | 0.1186  | 0.3607  | 3.88  | 0.000 |

|                                                                            |         |         |        |       |       |
|----------------------------------------------------------------------------|---------|---------|--------|-------|-------|
| Individual-level Race/ethnicity (Black)*<br>County-level Price-Chicken‡    | 0.0515  | -0.0703 | 0.1732 | 0.83  | 0.407 |
| Individual-level Race/ethnicity<br>(Hispanic)* County-level Price-Soda‡    | -0.1293 | -0.2988 | 0.0401 | -1.5  | 0.135 |
| Individual-level Race/ethnicity<br>(Hispanic)* County-level Price-Burger‡  | 0.0366  | -0.1089 | 0.1821 | 0.49  | 0.622 |
| Individual-level Race/ethnicity<br>(Hispanic)* County-level Price-Pizza‡   | -0.0119 | -0.0499 | 0.0262 | -0.61 | 0.541 |
| Individual-level Race/ethnicity<br>(Hispanic)* County-level Price-Steak‡   | -0.0087 | -0.0430 | 0.0256 | -0.5  | 0.620 |
| Individual-level Race/ethnicity<br>(Hispanic)* County-level Price-Milk‡    | 0.0898  | -0.0328 | 0.2124 | 1.44  | 0.151 |
| Individual-level Race/ethnicity<br>(Hispanic)* County-level Price-Chicken‡ | 0.2575  | 0.0838  | 0.4312 | 2.91  | 0.004 |
| Individual-level Race/ethnicity (Asian)*<br>County-level Price-Soda‡       | -0.1626 | -0.3692 | 0.0440 | -1.54 | 0.123 |
| Individual-level Race/ethnicity (Asian)*<br>County-level Price-Burger‡     | -0.1137 | -0.3339 | 0.1066 | -1.01 | 0.312 |
| Individual-level Race/ethnicity (Asian)*<br>County-level Price-Pizza‡      | 0.0859  | 0.0390  | 0.1328 | 3.59  | 0.000 |
| Individual-level Race/ethnicity (Asian)*<br>County-level Price-Steak‡      | -0.0199 | -0.0646 | 0.0248 | -0.87 | 0.384 |
| Individual-level Race/ethnicity (Asian)*                                   | 0.2919  | 0.1487  | 0.4350 | 4     | 0.000 |

|                                                        |         |         |         |       |       |
|--------------------------------------------------------|---------|---------|---------|-------|-------|
| County-level Price-Milk‡                               |         |         |         |       |       |
| Individual-level Race/ethnicity (Asian)*               | 0.3718  | 0.1328  | 0.6108  | 3.05  | 0.002 |
| County-level Price-Chicken‡                            |         |         |         |       |       |
| Individual-level Household Income*                     | 0.0028  | 0.0006  | 0.0049  | 2.55  | 0.011 |
| County-level Price-Soda‡                               |         |         |         |       |       |
| Individual-level Household Income*                     | -0.0019 | -0.0038 | 0.0000  | -1.92 | 0.055 |
| County-level Price-Burger‡                             |         |         |         |       |       |
| Individual-level Household Income*                     | 0.0000  | -0.0005 | 0.0005  | 0.05  | 0.959 |
| County-level Price-Pizza‡                              |         |         |         |       |       |
| Individual-level Household Income*                     | -0.0002 | -0.0007 | 0.0002  | -1.12 | 0.262 |
| County-level Price-Steak‡                              |         |         |         |       |       |
| Individual-level Household Income*                     | -0.0011 | -0.0027 | 0.0005  | -1.33 | 0.182 |
| County-level Price-Milk‡                               |         |         |         |       |       |
| Individual-level Household Income*                     | -0.0001 | -0.0017 | 0.0015  | -0.13 | 0.897 |
| County-level Price-Chicken‡                            |         |         |         |       |       |
| Individual-level Gender* County-level<br>Price-Soda‡   | 0.0652  | -0.0449 | 0.1753  | 1.16  | 0.246 |
| Individual-level Gender* County-level<br>Price-Burger‡ | 0.0271  | -0.0799 | 0.1342  | 0.5   | 0.619 |
| Individual-level Gender* County-level<br>Price-Pizza‡  | 0.0285  | 0.0048  | 0.0522  | 2.36  | 0.018 |
| Individual-level Gender* County-level<br>Price-Steak‡  | -0.0249 | -0.0464 | -0.0034 | -2.27 | 0.023 |

|                                                                                                                                                                                                                                                                                                                                                                                                                                                                                                                                                                                                                                                                                                                                                                                                                                                                                                           |         |         |         |       |        |
|-----------------------------------------------------------------------------------------------------------------------------------------------------------------------------------------------------------------------------------------------------------------------------------------------------------------------------------------------------------------------------------------------------------------------------------------------------------------------------------------------------------------------------------------------------------------------------------------------------------------------------------------------------------------------------------------------------------------------------------------------------------------------------------------------------------------------------------------------------------------------------------------------------------|---------|---------|---------|-------|--------|
| Individual-level Gender* County-level<br>Price-Milk‡                                                                                                                                                                                                                                                                                                                                                                                                                                                                                                                                                                                                                                                                                                                                                                                                                                                      | -0.1132 | -0.1896 | -0.0368 | -2.9  | 0.004  |
| Individual-level Gender* County-level<br>Price-Chicken‡                                                                                                                                                                                                                                                                                                                                                                                                                                                                                                                                                                                                                                                                                                                                                                                                                                                   | -0.0295 | -0.1149 | 0.0559  | -0.68 | 0.499  |
| Population Density§                                                                                                                                                                                                                                                                                                                                                                                                                                                                                                                                                                                                                                                                                                                                                                                                                                                                                       | 0.0000  | 0.0000  | 0.0000  | -4.12 | 0.0001 |
| Population <100% poverty (%)§                                                                                                                                                                                                                                                                                                                                                                                                                                                                                                                                                                                                                                                                                                                                                                                                                                                                             | -0.4216 | -0.5422 | -0.3010 | -6.85 | 0.0001 |
| Population College Educated (%)§                                                                                                                                                                                                                                                                                                                                                                                                                                                                                                                                                                                                                                                                                                                                                                                                                                                                          | -0.3605 | -0.4532 | -0.2678 | -7.62 | 0.0001 |
| Population White (%)§                                                                                                                                                                                                                                                                                                                                                                                                                                                                                                                                                                                                                                                                                                                                                                                                                                                                                     | -0.1666 | -0.2285 | -0.1047 | -5.27 | 0.0001 |
| Alpha                                                                                                                                                                                                                                                                                                                                                                                                                                                                                                                                                                                                                                                                                                                                                                                                                                                                                                     | 0.2245  | 0.2141  | 0.2355  |       |        |
| <p>*Longitudinal negative binomial model, includes all terms listed in table as well as indicator variables for school (not shown)</p> <p>†The association between age and the outcome variable was not linear. The most appropriate specification was to use indicator variables for each age category.</p> <p>‡Council for Community and Economic Research. Price data are County-specific (aggregated to the county-level), real prices, in 2006 US dollars, for a 2-L bottle of soda (“soda”), a one-quarter pound hamburger purchased at a fast food restaurant (“burger”), a 13-in cheese pizza, regular crust, purchased away from home (“pizza”), a one-half gallon of whole milk (“whole milk”), 1 lb US Department of Agriculture choice steak (“steak”), and fried chicken pieces, thigh and drumstick, purchased away from home (“fried chicken”).</p> <p>§Census Tract Level (US Census)</p> |         |         |         |       |        |
